# Supplementary material for: Annual decline in forced expiratory volume and airway inflammatory cells and mediators in a general population-based sample
Source: Springer Nature journal article supplement (doi:10.1186/s12890-018-0765-7), 2019-05-09
Supplement: MOESM1 [file 16712206]

## Questionnaire of clinical data

### Smoking history:

1. Do you smoke or have you ever been smoking more than one cigarette a day during a year?

Yes  No

2. If «yes» to question (1),

How many cigarettes did you smoke during this period of time (on average)?

..... cigarettes / day

2.1 How old were you when you started to smoke regularly? ..... (years)

2.2 Have you ever tried to quit? Yes  No

2.3 If you have quit smoking how old were you when you quit? ..... (years)

### Respiratory symptoms:

1. Do you usually have any of the symptoms listed below even if you are not having cold?

1.1. Cough Yes  No

1.2 Sputum Yes  No

1.3 Piping in the chest Yes  No

2. Have you ever been bothered by any of these symptoms in recent years?

2.1 Daily cough for at least three months a year during the last two years? Yes  No

2.2 Dyspnea when you walk on a flat terrain or uphill? Yes  No

2.2 Dyspnea when you walk at home on a flat surface? Yes  No

3. Have you contacted a doctor because of any of these symptoms? Yes  No

4. Do you still have these symptoms? Yes  No

5. Have you received treatment with antibiotics ("penicillin") against pneumonia or bronchitis in the last three years? Yes  No

If "yes" to question (5), how long ago did it happen?

- 0-3 months
- 4-12 months
- 1-2 years
- 2-3 years
- More than 3 years

Diseases:

Have you been diagnosed or treated for any of these diseases by a family doctor or at a hospital?

- 1. Angina pectoris (chest pain) Yes  No
- 2. Heart Infarction Yes  No
- 3. Heart surgery (bypass) Yes  No
- 4. Stenting to the heart Yes  No
- 5. Abdominal or thoracic aorta (the main blood vessel in the belly and thorax)?  
Yes  No
- 6. Blood vessels at the neck or legs Yes  No
- 7. High blood pressure Yes  No
- 8. Asthma Yes  No
- 9. COPD Yes  No
- 10. Chronic bronchitis Yes  No
- 11. Diabetes Yes  No

Medication:

1. Do you use any of these drugs?

- 1.1 Aspirin Yes  No
- 1.2 Statins Yes  No

1.3 Inhaled steroids Yes  No

1.4 Other medications? Yes  No

.....  
.....

Education

How many years of education do you have (including primary school)?..... years

Do you work? Yes  No

If "Yes" : How long have you worked in your current profession?

If "No": are you:

Student  Retired  Housewife  Unemployed  Disabled

Asbestos

1. Have you ever worked with asbestos Yes  No

If "yes",

1.1 How often did you work with asbestos?

Every day  minimum 3 days/week  Minimum 1-2 times a month

less than once a month

1.2 How many years have you worked with asbestos?..... (years)
